# Supplementary material
Source: Copernicus journal article supplement (doi:10.5194/egqsj-20-5-1969)
Supplement: Supplementary file 1 [file egqsj-20-5-1969-supplement.pdf]

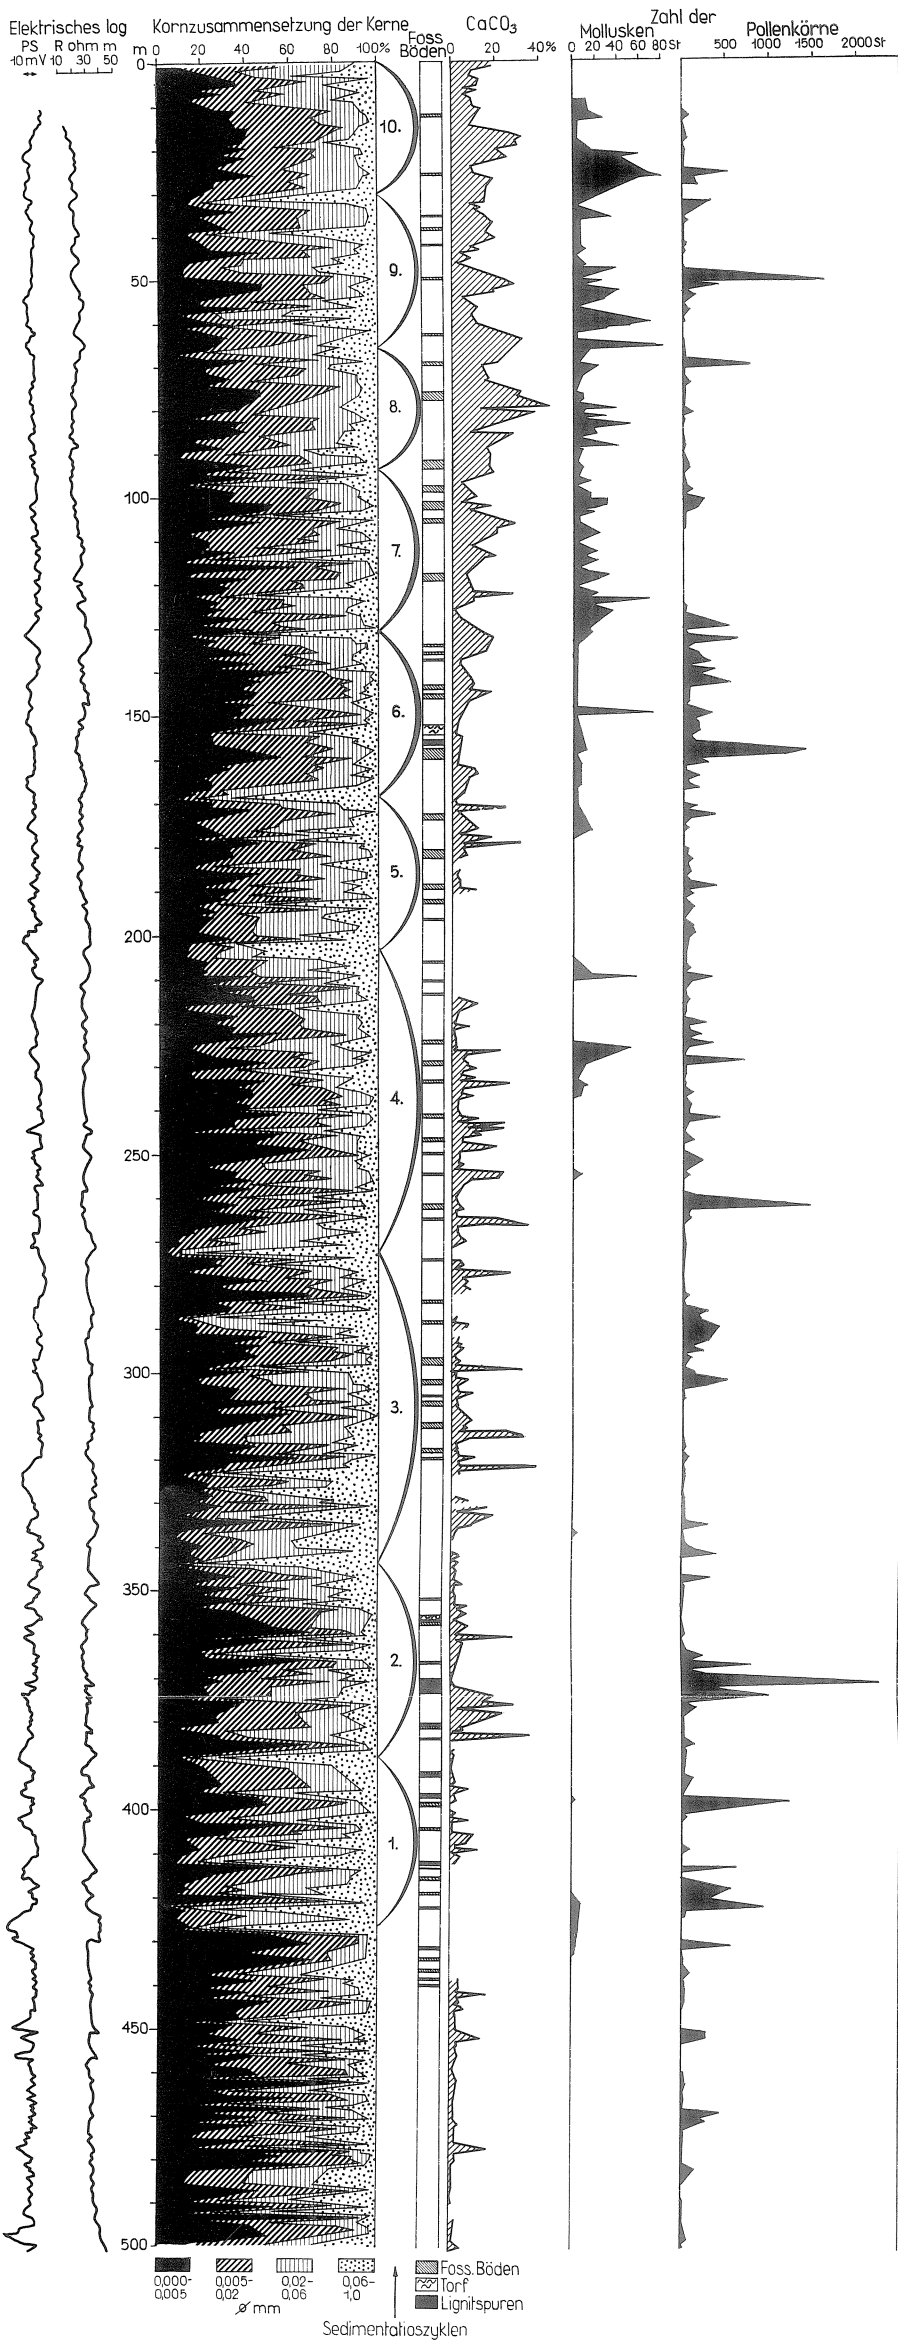

Abb. 3. Geologisches Profil der quartären Schichten, die von der Bohrung 1 von Jászladány durchfahren wurden.
